# Supplementary figures and images for: Adhesion of Gastric Cancer Cells to the Enteric Nervous System: Comparison between the Intestinal Type and Diffuse Type of Gastric Cancer
Source: MDPI journal article supplement (doi:10.3390/cancers14143296), 2022-07-06

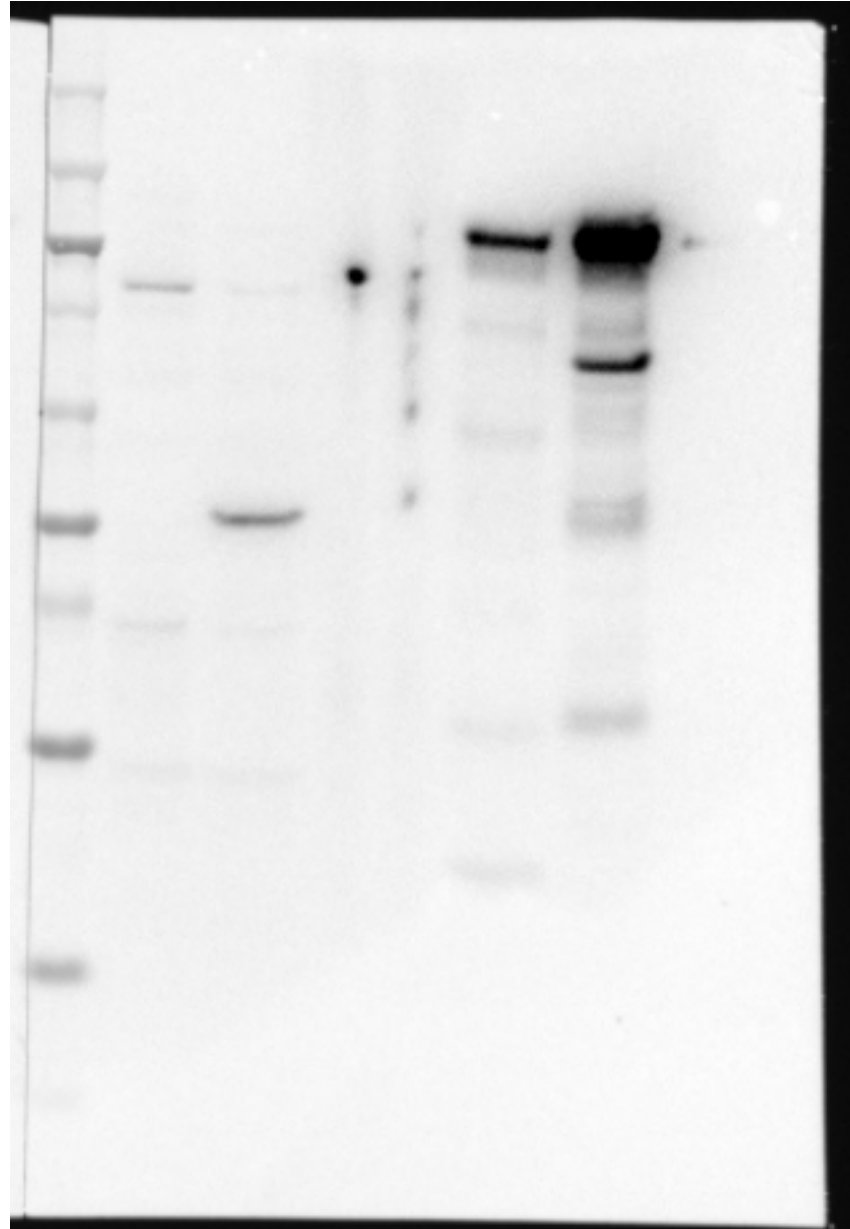

Supplement: s1 [file s1]
